# Supplementary material
Source: publisher figshare collection journal article supplement (https://acs.figshare.com/ndownloader/files/9289960)
Supplement: Supplementary file 1 [file 9289960]

# *Supporting Information*

## *High Strength Astringent Hydrogels Using Protein as the Building Block for Physically Crosslinked Multi-Network*

*Rongnian Xu<sup>ab‡</sup>, Shuanhong Ma<sup>a‡</sup>, Peng Lin<sup>a</sup>, Bo Yu<sup>a</sup>, Feng Zhou<sup>a\*</sup>, Weimin Liu<sup>a\*</sup>*

*R. Xu, S. Ma, P. Lin, Prof. F. Zhou, Prof. W. Liu*

*<sup>a</sup> State Key Laboratory of Solid Lubrication, Lanzhou Institute of Chemical Physics  
Chinese Academy of Sciences*

*Lanzhou 730000, China*

*E-mail: zhouf@licp.cas.cn; wmliu@licp.cas.cn*

*R. Xu*

*<sup>b</sup> College of Materials Science and Opto-Electronic Technology, University of Chinese  
Academy of Sciences*

*Beijing 100049, China*

*<sup>‡</sup> These people contribute equally.*

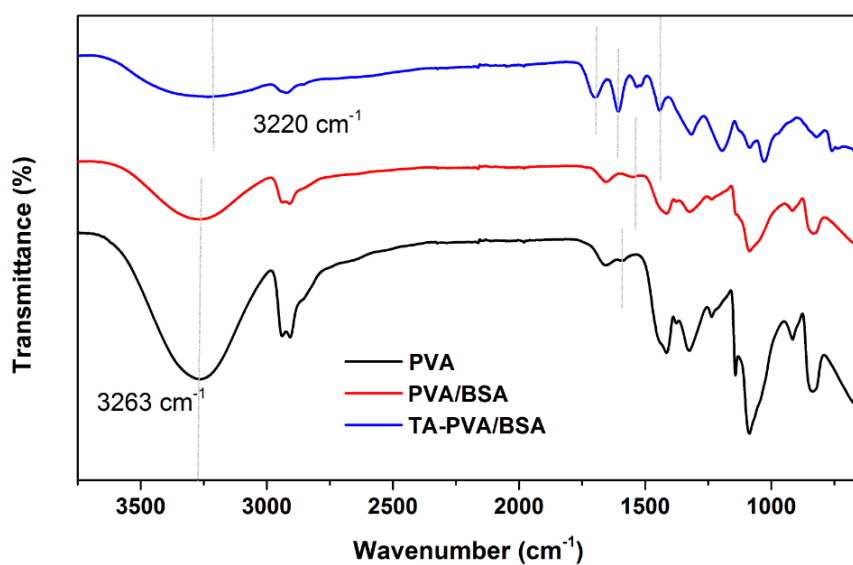

**Figure S1.** Fourier-transform infrared spectroscopy (FTIR) of the as-prepared hydrogels.

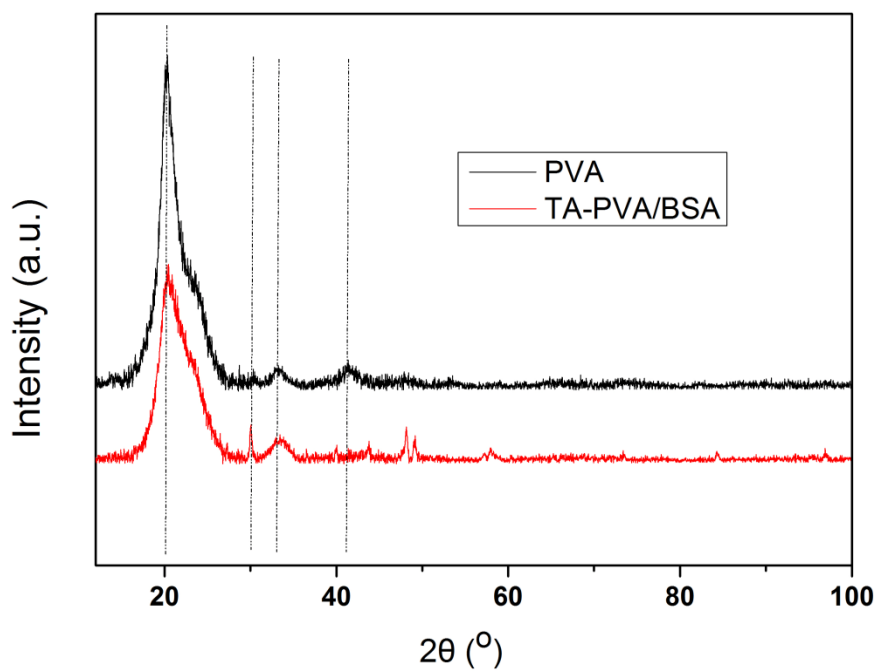

**Figure S2.** X-ray diffraction (XRD) patterns of PVA hydrogel and TA-PVA/BSA hydrogel.

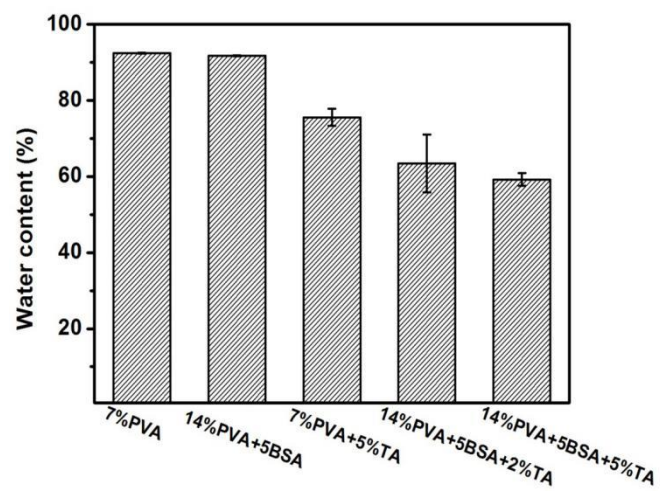

**Figure S3.** The water content of hydrogels.

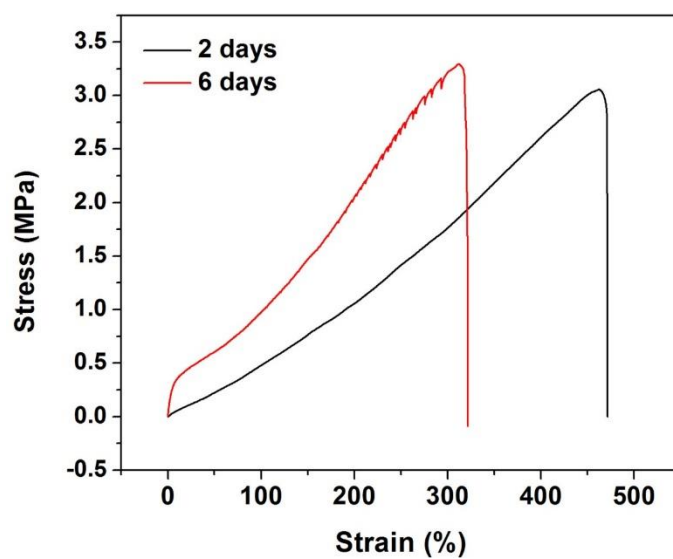

**Figure S4.** Stress-strain curves of TA(5%)-PVA@BSA(5mg/mL) hydrogel with different soaking time in TA.

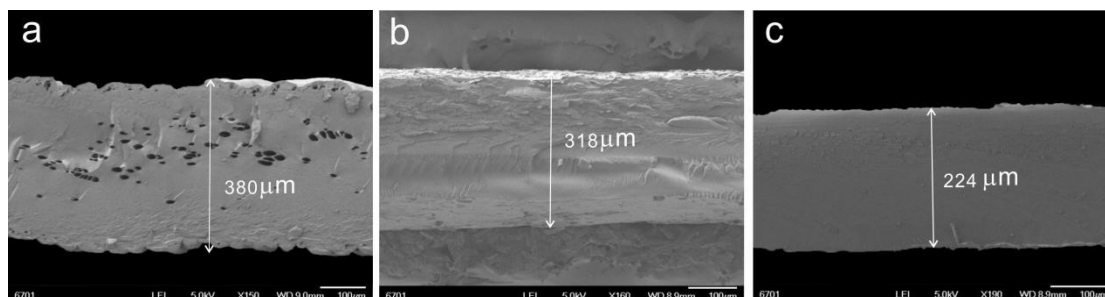

**Figure S5.** The cross-sectional SEM morphology of TA-PVA@BSA(5mg/mL) hydrogel with different immersing time in 5% TA solution (the original thickness of PVA@BSA hydrogel is 0.8 mm, BSA: 5mg/mL). (a) 6h; (b) 12h and (c) 48h.

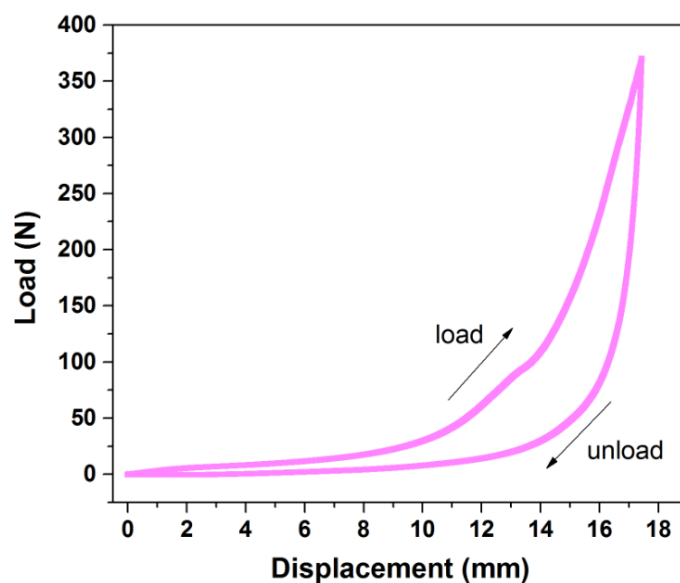

**Figure S6.** Load-unload compression curve of TA(5%)-PVA@BSA(5mg/mL) hydrogel cylinder after heating at 50 °C for 22 h.
